# Supplementary material
Source: PubMed Central journal article supplement (PMC3015153)
Supplement: emm-42-799-s001.pdf [file emm-42-799-s001.pdf]

**Supplemental Data**

**Figure S1.** Thirteen facial landmarks in frontal and lateral views. This figure was modified and redrawn from a previously reported figure (Farkas, 1994).

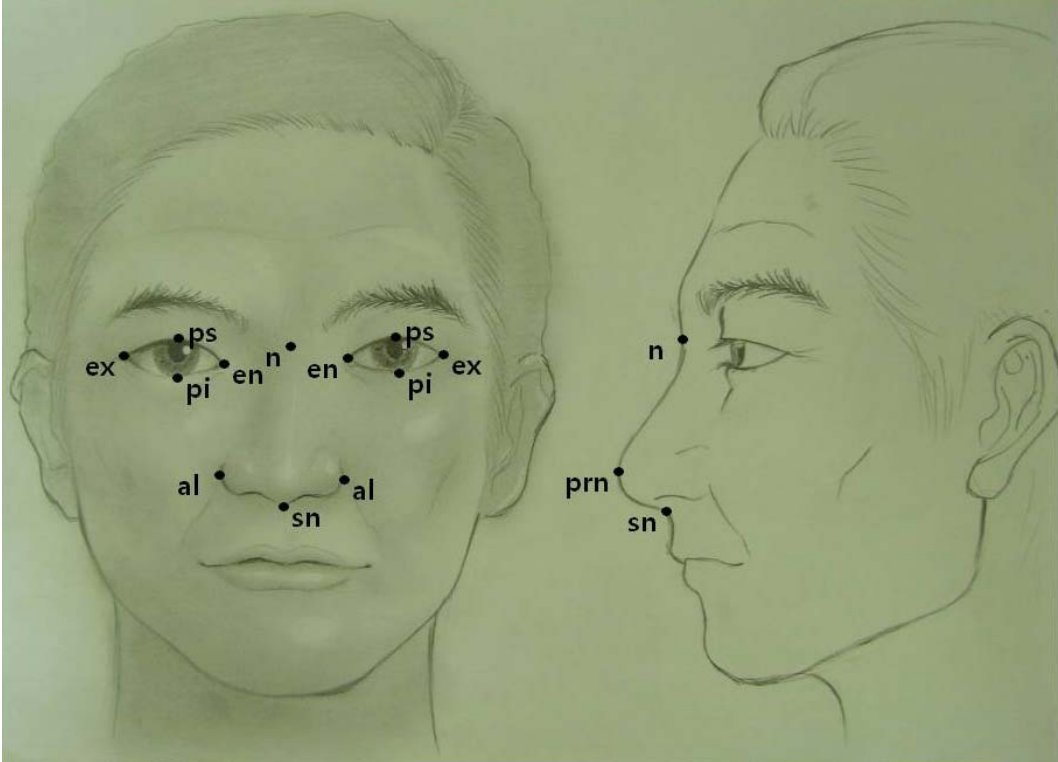

## Supplemental Data

**Table S1.** Description of seven ocular and nasal traits measured

| Region | Landmarks                                            | Linear measurements       | Abbreviation |
|--------|------------------------------------------------------|---------------------------|--------------|
| Eye    | ex : Exocanthion(R)<br>ex : Exocanthion(L)           | Biocular width            | ex-ex        |
|        | en : Endocanthion(R)<br>en : Endocanthion(L)         | Intercanthal width        | en-en        |
|        | en : Endocanthion<br>ex : Exocanthion                | Length of the eye fissure | en-ex        |
|        | ps : Palpebrale superius<br>pi : Palpebrale inferius | Height of the eye fissure | ps-pi        |
| Nose   | al : Alare(R)<br>al : Alare(L)                       | Width of the nose         | al-al        |
|        | n : Nasion<br>sn : Subnasale                         | Height of the nose        | n-sn         |
|        | sn : Subnasale<br>prn : Pronasale                    | Nasal protrusion          | sn-prn       |
